# Supplementary material
Source: bioRxiv or medRxiv preprint supplement (https://www.biorxiv.org/highwire/filestream/73853/field_highwire_adjunct_files/0/241224-1.pdf)
Supplement: Supplementary file [file 241224-1.pdf]

## SUPPLEMENTAL TABLES

| Gene              | Forward Primer             | Reverse Primer             |
|-------------------|----------------------------|----------------------------|
| TNF- $\alpha$     | 5' ACTGAACTTCGGGGTGATCG    | 5' TGAGGGTCTGGGCCATAGAA    |
| IL-6              | 5' GGATACCACTCCCAACAGACCT  | 5' GCCATTGCACAACTCTTTTCTC  |
| IL-1 $\beta$      | 5' GCAACTGTTCTGAACTCAACT   | 5' ATCTTTTGGGGTCCGTCAACT   |
| iNOS              | 5' GTTCTCAGCCCAACAATACAAGA | 5' GTGGACGGGTCGATGTCAC     |
| KC                | 5' CTGGGATTCACCTCAAGAACATC | 5' CAGGGTCAAGGCAAGCCTC     |
| Mrc1              | 5' CTCTGTTTCTGCTATTGGACGC  | 5' CGGAATTTCTGGGATTCAGCTTC |
| Mgl1              | 5' TGAGAAAGGCTTTAAGAACTGGG | 5' GACCACCTGTAGTGATGTGGG   |
| Rentla            | 5' CCAATCCAGCTAACTATCCCTCC | 5' CCAGTCAACGAGTAAGCACAG   |
| Chil3             | 5' AGGAAGCCCTCCTAAGGACA    | 5' CTCCACAGATTCTTCTCAAAGC  |
| IL-10             | 5' AGGCGCTGTCATCGATTTCTC   | 5' GCCTTGTAGACACCTTGGTCTT  |
| CD68              | 5' GCAGCACAGTGGACATTCAT    | 5' AGAGAAACATGGCCC GAAGT   |
| F4/80<br>(Adgre1) | 5' GCC CAG GAGTGGAAATGTCAA | 5' CAGACACTCATCAACATCTGCG  |
| B2m               | 5' TTCTGGTGCTTGTCTCACTGA   | 5' CAGTATGTTCTGGCTTCCCATT  |
| Ppia              | 5' GAGCTGTTGCAGACAAAGTTC   | 5' CCCTGGCACATGAATCCTGG    |

**Suppl. Table 1:** Mouse M1- and M2- and HKG primers sequences

| Gene          | Forward Primer              | Reverse Primer               |
|---------------|-----------------------------|------------------------------|
| TNF- $\alpha$ | 5' CAGAGGGCCTGTACCTCATC     | 5' GGAAGACCCCTCCCAGATAG      |
| MCP-1         | 5' CCCCAGTCACCTGCTGTTAT     | 5' TGGAATCCTGAACCCACTTC      |
| Mrc1          | 5' CGAGGAAGAGGTTTCGGTTCACC  | 5' GCAATCCCGGTTCTCATGGC      |
| CD163         | 5' TTGCCAGCAGCTTAAATGTG     | 5' AGGACAGTGTTGGGACTGG       |
| B2m           | 5' GCTCGCGCTACTCTCTCTTT     | 5' TGTCGGATGGATGAAACCCA      |
| Ppia          | 5' GCATACGGGTCCTGGCATCTTGTC | 5' ATGGTGATCTTCTTGCTGGTCTTGC |

**Suppl. Table 2:** Human M1- and M2- and HKG primers sequences

| IHC   | Primary antibody                                     | Diluent | Visualization                                               |
|-------|------------------------------------------------------|---------|-------------------------------------------------------------|
| F4/80 | F4/80 T-2006 clone BM8<br>BMA Biomedicals            | 1/50    | Performed on Discovery Ventana<br>UltraMap anti Rat DAB Kit |
| B220  | B220 553084 clone RA3-6B2,<br>BD Biosciences         | 1/4000  | Performed on Discovery Ventana<br>UltraMap anti Rat DAB Kit |
| CD3   | CD3 MA1-90582 clone SP7,<br>Thermo Fisher Scientific | 1/300   | Performed on Bond Leica DAB Kit                             |
| Ly-6G | Ly-6G 551459 clone 1A8,<br>BD Biosciences            | 1/600   | Performed on Bond Leica DAB Kit                             |

**Suppl. Table 3:** Antibodies for IHC of immune cells in paraffin liver sections

|                                          | Healthy Controls<br>(n=6) | Diabetics,<br>adequate control<br>(n=5) | Diabetics,<br>inadequate control<br>(n=7) |
|------------------------------------------|---------------------------|-----------------------------------------|-------------------------------------------|
| <b>General parameter</b>                 |                           |                                         |                                           |
| Sex (M/F)                                | 6/0                       | 3/2                                     | 4/3                                       |
| Age (years)                              | 29.5±3.3                  | 57.0±5.0                                | 52.7±5.5                                  |
| BMI (kg/m <sup>2</sup> )                 | 22.8±1.5                  | 33.5±1.9                                | 37.4±4.5                                  |
| Weight (kg)                              | 74.8±4.6                  | 100.0±7.6                               | 111.3±16.8                                |
| Waist-to-hip Ratio                       | 0.86±0.02                 | 0.99±0.05                               | 1.04±0.05                                 |
| <b>Glc metabolism</b>                    |                           |                                         |                                           |
| HbA1c (% (mmol/mol))                     | na                        | <b>7.0±0.5 (53)</b>                     | <b>12.6±0.6** (114)</b>                   |
| Fasting plasma glucose (mmol/l), average | na                        | <b>8.3±1.2</b>                          | <b>16.0±1.3**</b>                         |
| Diabetes duration (years)                | na                        | 7.2±3.9                                 | 12.9±4.9                                  |
| Antidiabetics                            |                           |                                         |                                           |
| - Oral/GLP1-Anal. (%)                    | na                        | 80                                      | 85.7                                      |
| - Insulin (%)                            | na                        | 20                                      | 85.7                                      |
| <b>Inflammation</b>                      |                           |                                         |                                           |
| CRP (mg/dl)                              |                           | 3.9±0.6                                 | 10.0±4.6                                  |
| Leukocytes (x10 <sup>9</sup> /l)         |                           | <b>6.4±0.4</b>                          | <b>8.3±0.7*</b>                           |
| <b>Other Cv-Risks</b>                    |                           |                                         |                                           |
| Blood Pressure                           |                           |                                         |                                           |
| - Antihypertensive drug (%)              | 0                         | 40                                      | 85.7                                      |
| - Systolic (mmHg)                        | 125±4                     | 126±9                                   | 143±7                                     |
| - Diastolic (mmHg)                       | 72±4                      | 80±6                                    | 83±5                                      |
| Family History                           |                           |                                         |                                           |
| - Diabetes (%)                           | 16.7                      | 100                                     | 57.1                                      |
| - Obesity (%)                            | 16.7                      | 80                                      | 57.1                                      |
| - CV disease (%)                         | 16.7                      | 40                                      | 42.9                                      |
| Smoking (%)                              | 0                         | 0                                       | 42.9                                      |

**Suppl. Table 4: Baseline characteristics of healthy, adequately and inadequately controlled diabetics.** Statistical differences between adequately and inadequately controlled diabetics are indicated in bold font. Data presented as mean±SEM, na: not applicable, \*p<.05, \*\*p<.01

SUPPLEMENTAL FIGURES

Suppl. Figure 1

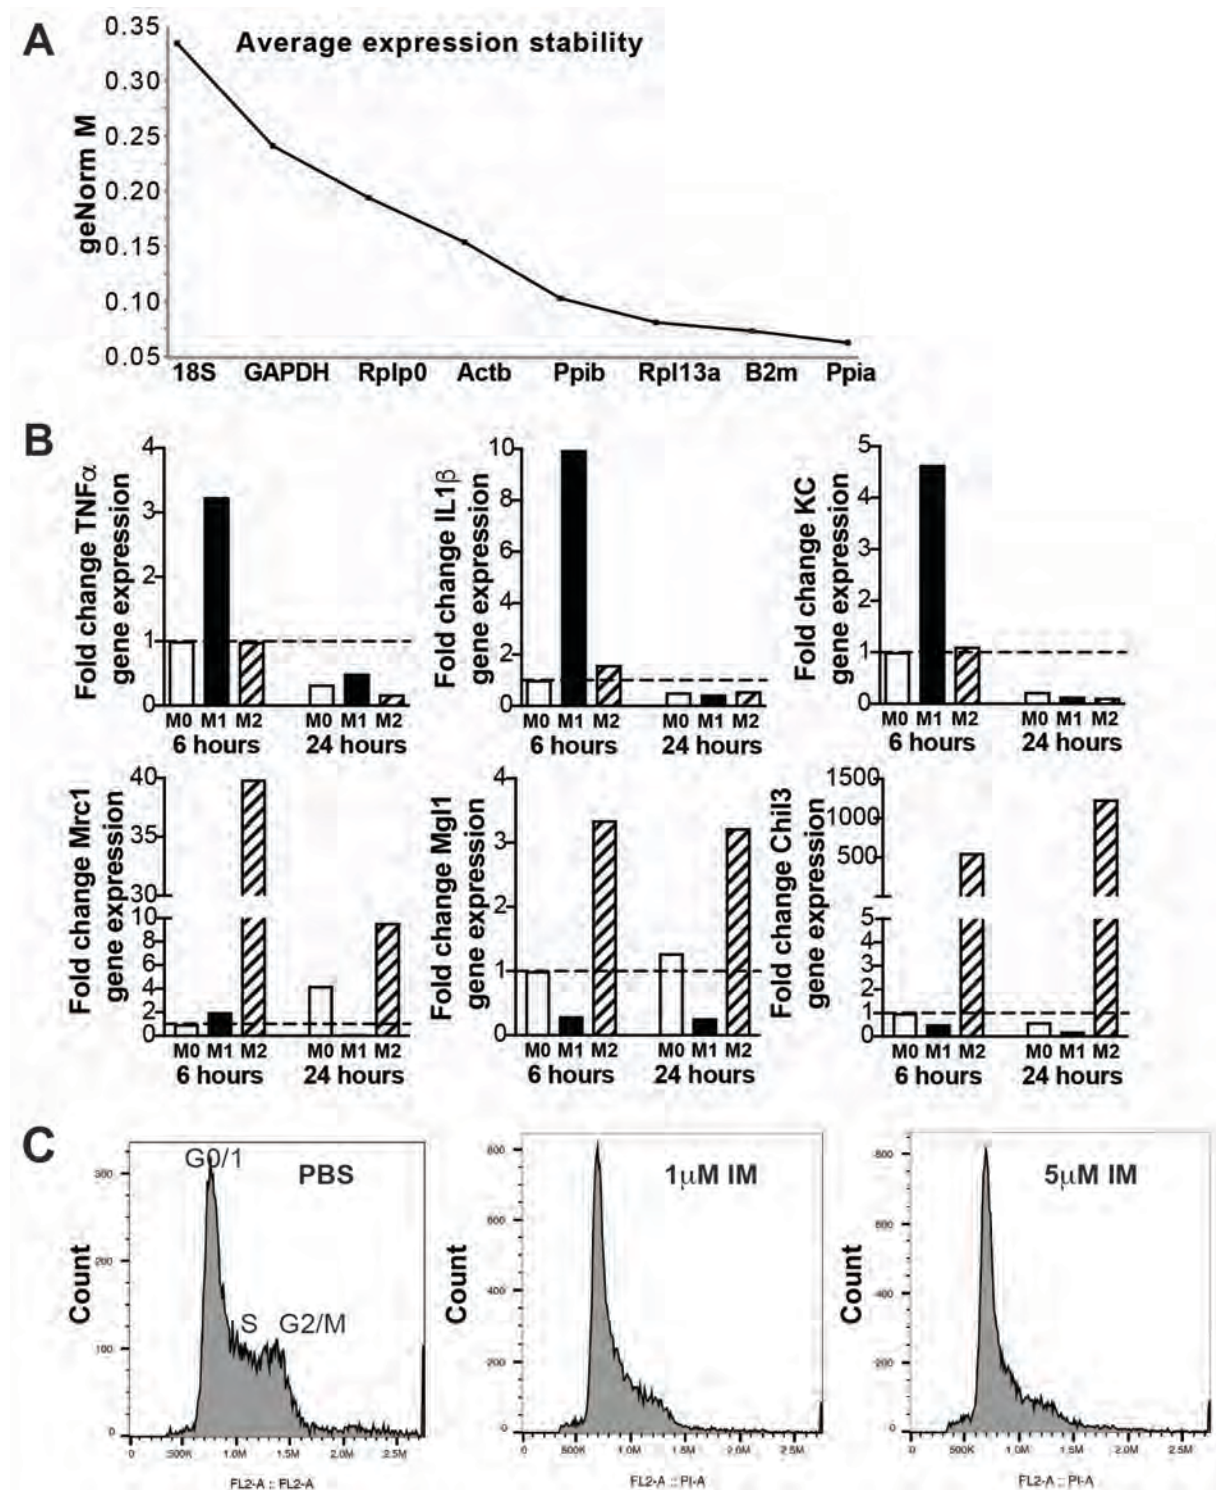

Suppl. Fig. 1: Optimization of *In Vitro* Set-Up.

Due to the highly dynamic behavior of macrophages, we optimized *in vitro* readouts for macrophage housekeeping genes (HKGs), the optimal time point for macrophage activation

and imatinib dose. **A:** Average expression stability of HKGs 18S, GAPDH, Rplp0, Actb, Ppib, Rpl13a, B2m, Ppia according to the geNorm algorithm with B2m and Ppia most stably expressed. **B:** The 6-hour time point was chosen for peritoneal macrophages when fold gene expression of pro-inflammatory M1-markers was most pronounced, while fold gene expression of anti-inflammatory M2-markers was similar at 6 and 24 hours after stimulation. **C:** Flow cytometry for cell cycle with G1-phase arrest of the CML-cell line K562 at both 1uM and 5uM imatinib compared to PBS-treated cells.

### Suppl. Figure 2

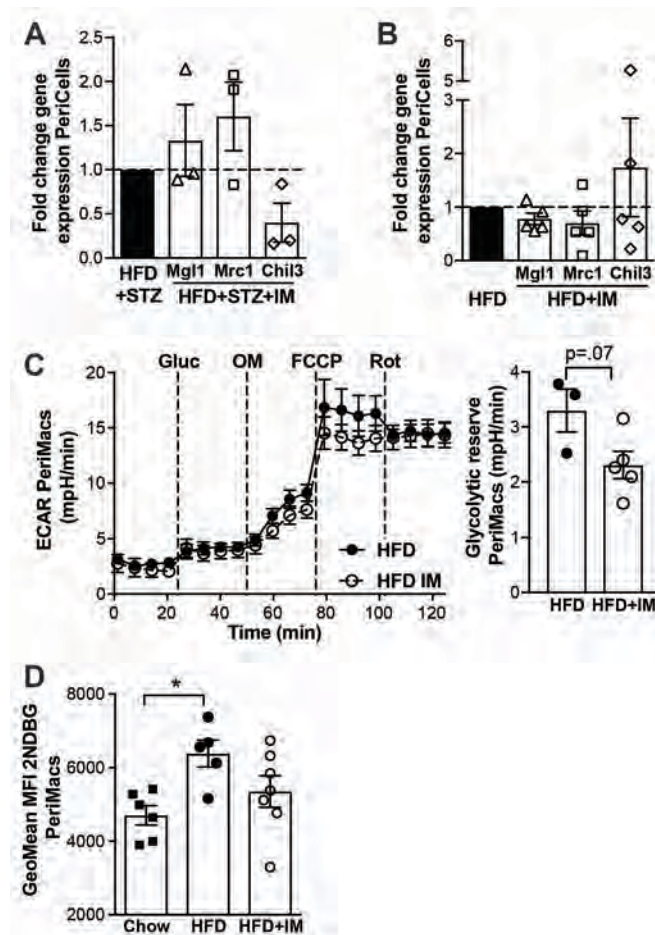

**Suppl. Fig. 2: Anti-inflammatory Gene Expression and Glycolysis in Peritoneal Macrophages of Imatinib-Treated Mice.**

**A/B:** Fold change of anti-inflammatory gene expression in peritoneal cells of diabetic and obese mice treated with imatinib compared to their respective controls. **C:** Seahorse flux

analysis with ECAR (measure of metabolic glycolysis) and calculated glycolytic reserve (mpH/min) in peritoneal macrophages of HFD-fed mice treated for 3 months with imatinib or vehicle. **D:** Flow cytometric 2-NDBG in peritoneal macrophages of imatinib-treated mice and controls. HFD+STZ: HFD-fed/STZ-treated controls, HFD+STZ+IM: HFD-fed/STZ/imatinib-treated mice; HFD: HFD-fed controls, HFD+IM: HFD-fed/imatinib-treated mice. Data expressed as mean±SEM, \*= $p < .05$ .



Suppl. Figure 3

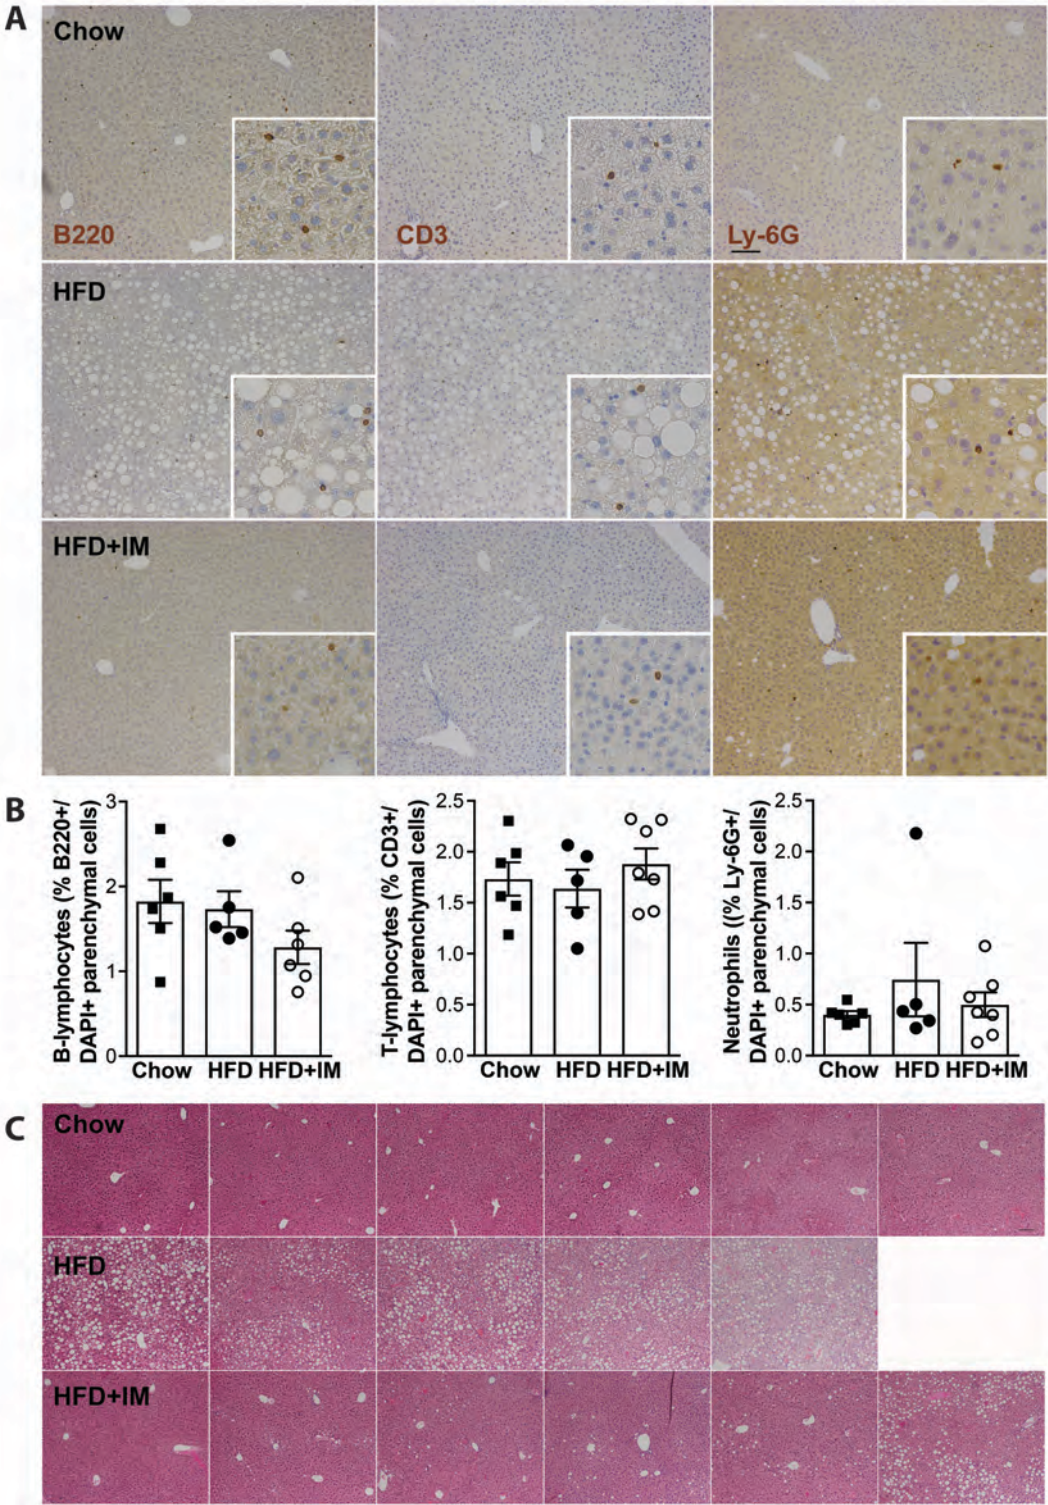

Suppl. Fig. 3: Liver Histology of B- and T-lymphocytes and Neutrophils and Liver Sections of Individual Mice Regarding Steatosis.

A/B: Representative pictures (scale bar = 100µm) and quantification of B-lymphocytes (% B220+/DAPI+ parenchymal cells), T-lymphocytes (% CD3+/DAPI+ parenchymal cells) and

neutrophils (Ly-6G+/DAPI+ parenchymal cells) in chow, HFD and HFD+IM-treated mice.

C: H&E liver sections of 5-6 individual chow, HFD and HFD+IM-treated mice. HFD: high fat diet; IM: imatinib.

### Suppl. Figure 4

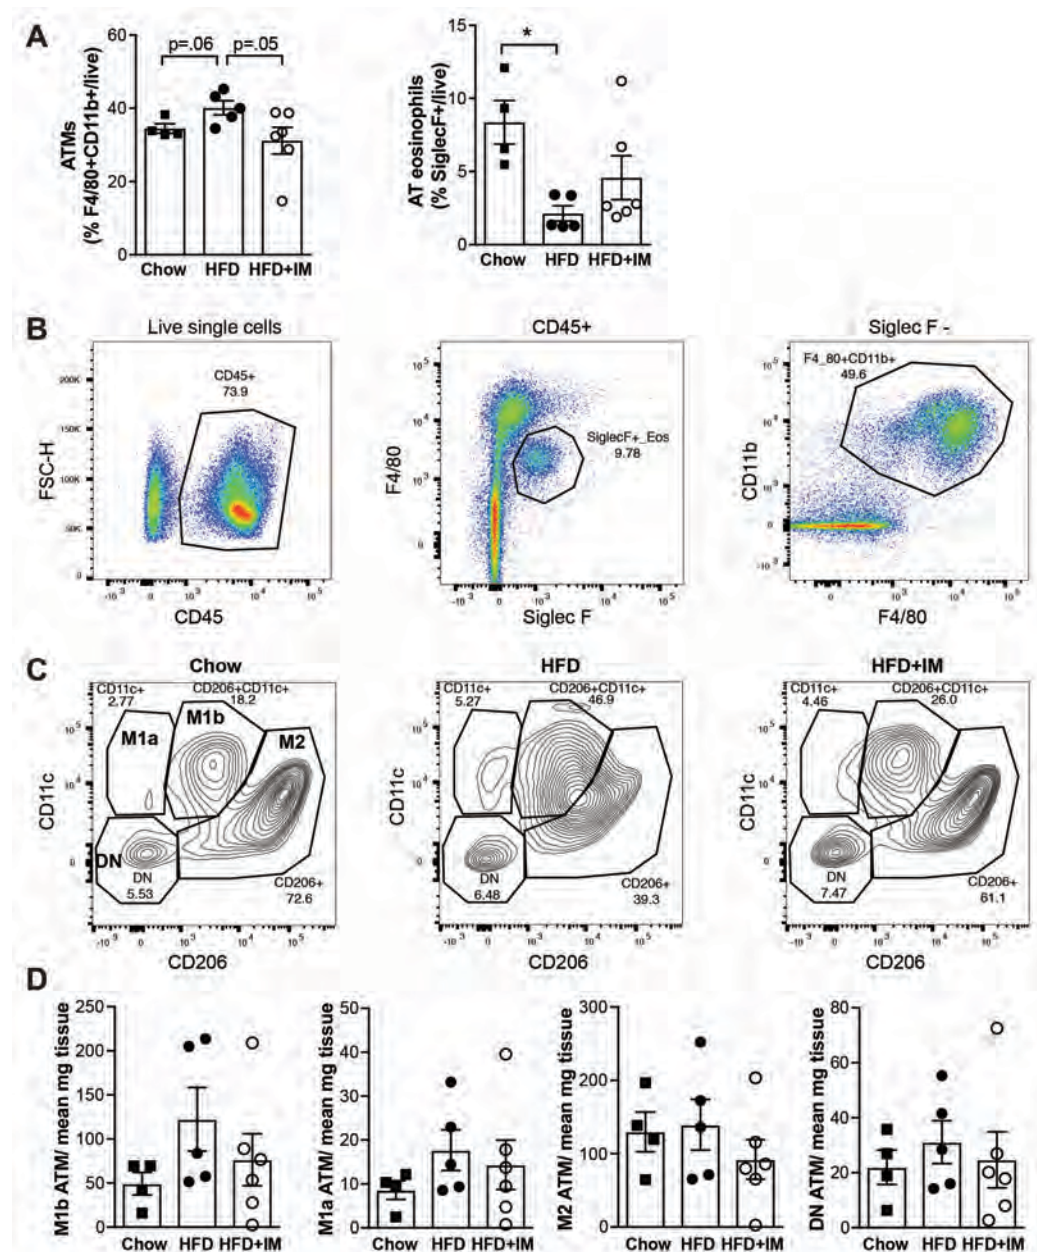

**Suppl. Fig. 4: Adipose Tissue Macrophages upon Imatinib Treatment.**

**A:** Quantification of ATM and eosinophils as percentage of live cells by flow cytometry of chow, HFD and HFD+IM-treated mice (n = 4-6). Adipose tissue macrophage subpopulation



flow cytometric staining strategy (B), representative flow cytometry plots (M1a: CD11c+CD206-; M1b: CD11c+CD206+; M2: CD11c<sup>low</sup>CD206<sup>high</sup>; DN: CD11c-CD206-; C) and quantification of absolute cell number (D) in chow, HFD and HFD+IM-treated mice (n = 4-6). ATM: adipose tissue macrophage; HFD: high fat diet; IM: imatinib; DN: double-negative.

### Suppl. Figure 5

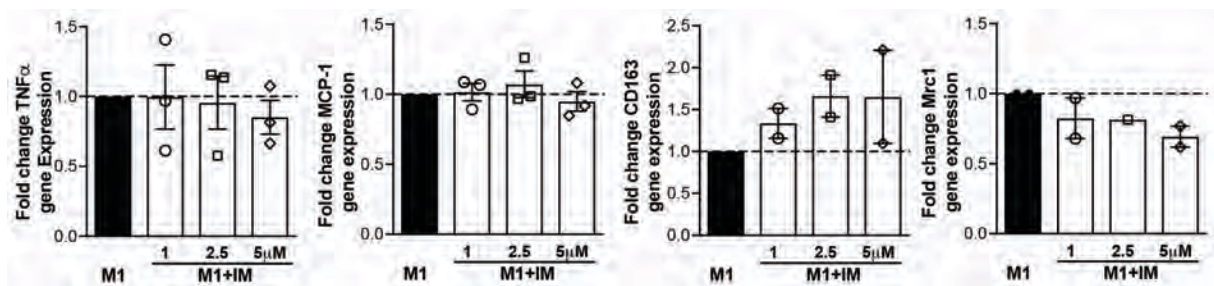

**Suppl. Fig. 5: Increasing Doses of Imatinib in Activated Monocytes of Inadequately Controlled Diabetics.**

Fold change of gene expression of TNF $\alpha$ , MCP-1, CD163 and Mrc1 with increasing doses of imatinib (1, 2.5, 5  $\mu$ M) in inadequately controlled diabetics (n = 3). M1: pro-inflammatory; M1+IM: pro-inflammatory/imatinib-treated.
